# Supplementary material for: Transcriptome Analysis of Thiram-Treated Zebrafish (Danio rerio) Embryos Reveals Disruption of Reproduction Signaling Pathways
Source: MDPI journal article supplement (doi:10.3390/biology12020156), 2023-01-19
Supplement: s1 [file s1]

## Transcriptome Analysis of Thiram-treated Zebrafish (*Danio rerio*) Embryos Reveals Disruption of Reproduction Signaling Pathways

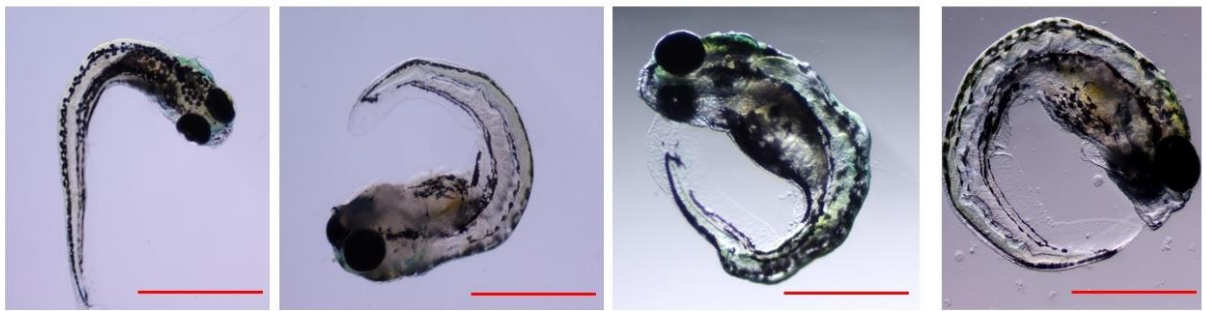

**Figure S1.** Representative images showing spinal curves observed in HTZF (zebrafish treated with 4.0  $\mu\text{g/L}$  thiram); Scale = 0.5mm.

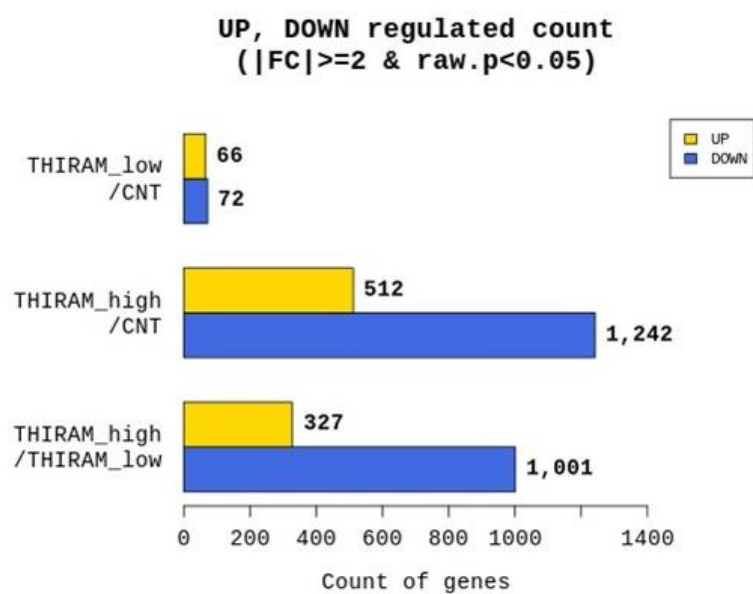

CNT, DMSO-treated fish  
 THIRAM\_high, 4.0  $\mu\text{g/L}$  thiram-treated fish  
 THIRAM\_low, 0.4  $\mu\text{g/L}$  thiram-treated fish

**Figure S2.** Up and down-regulated count of Differentially Expressed Genes. Yellow bar, upregulated DEGs; blue bar, downregulated DEGs.

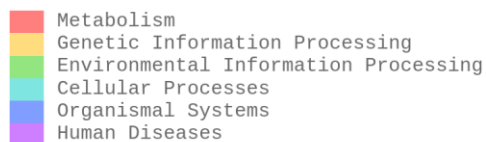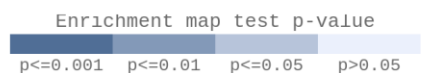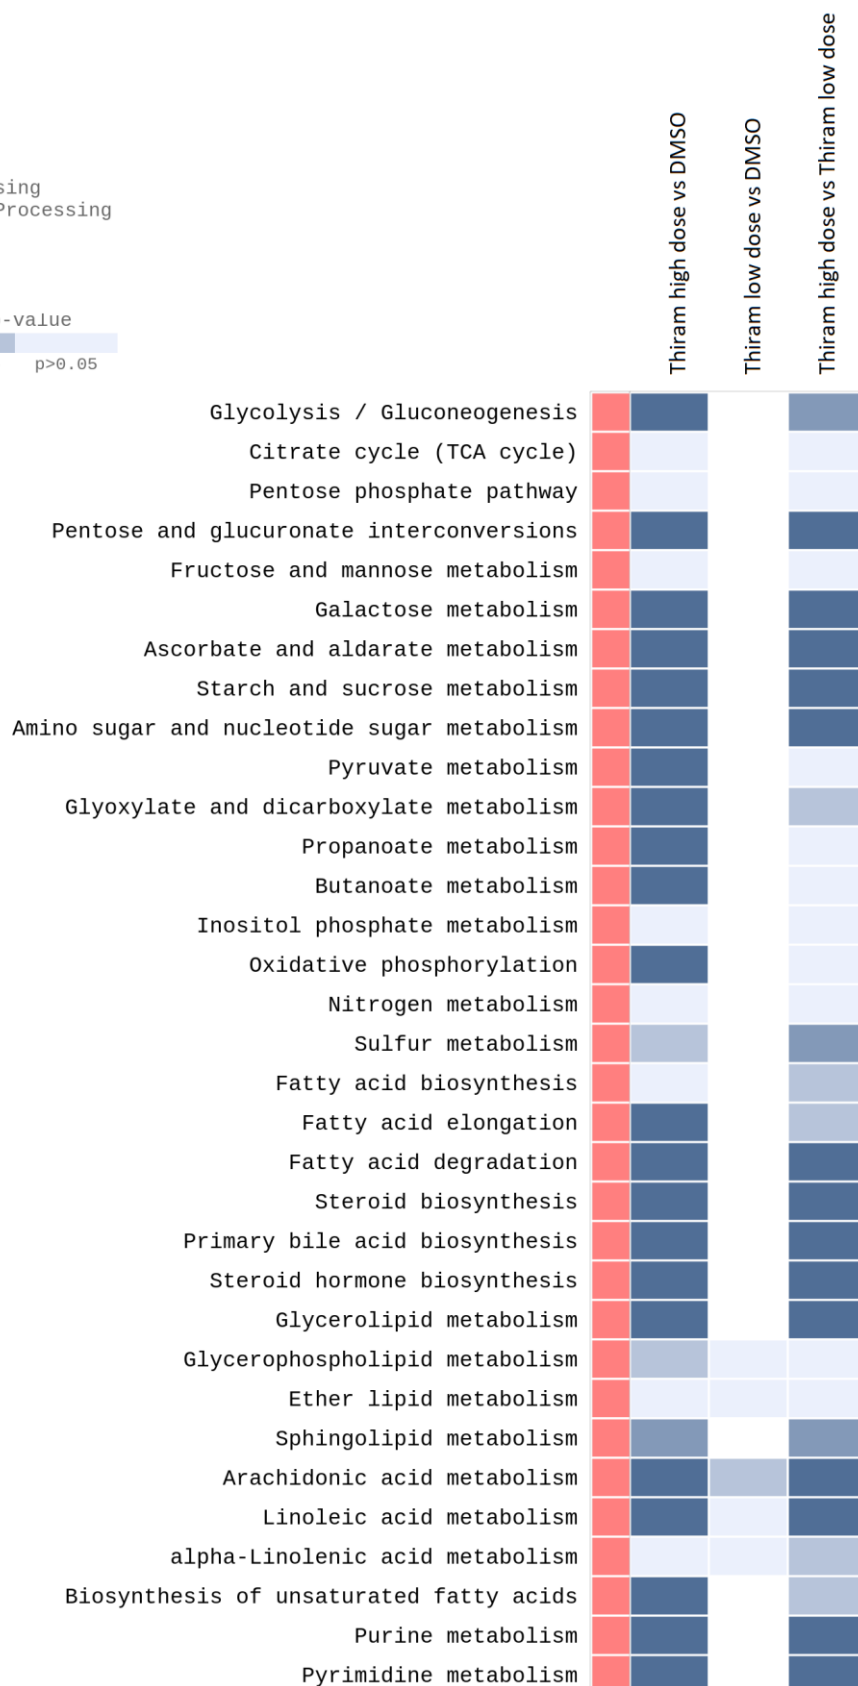

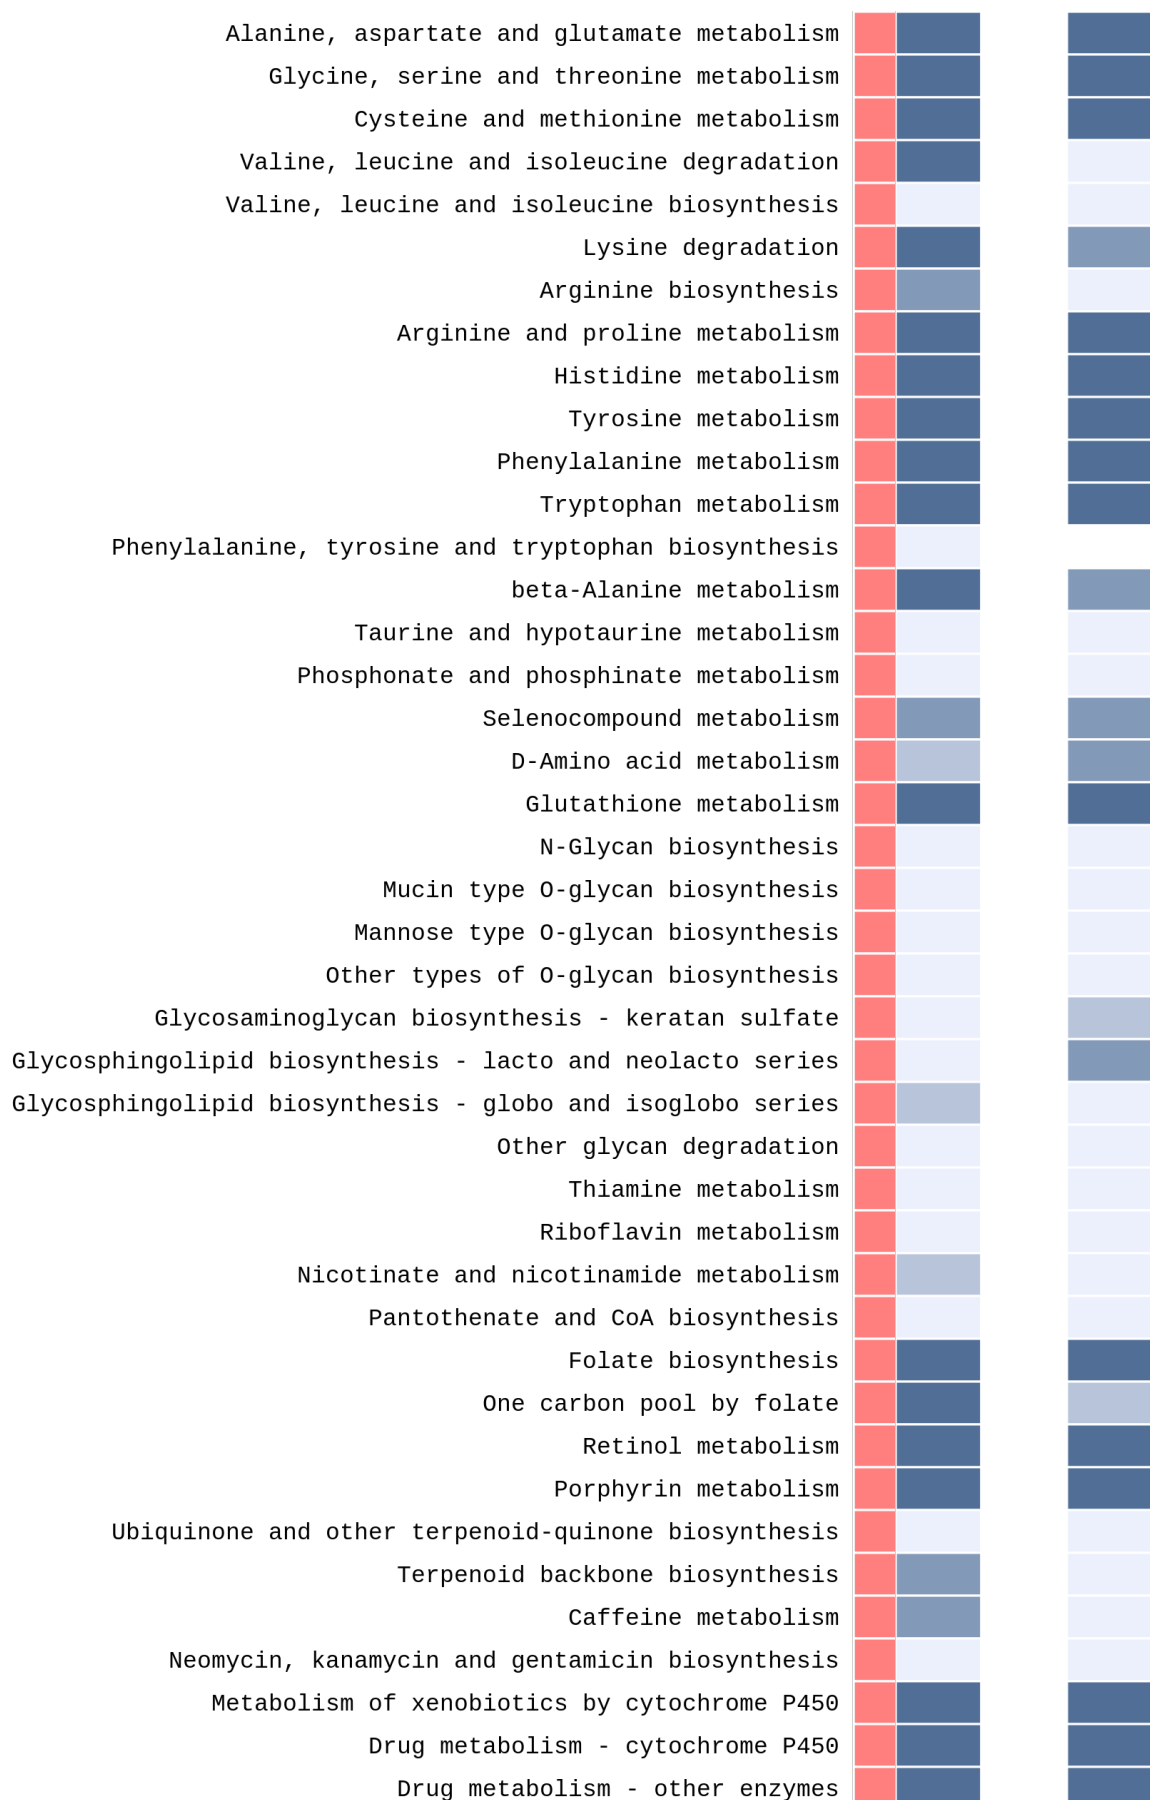

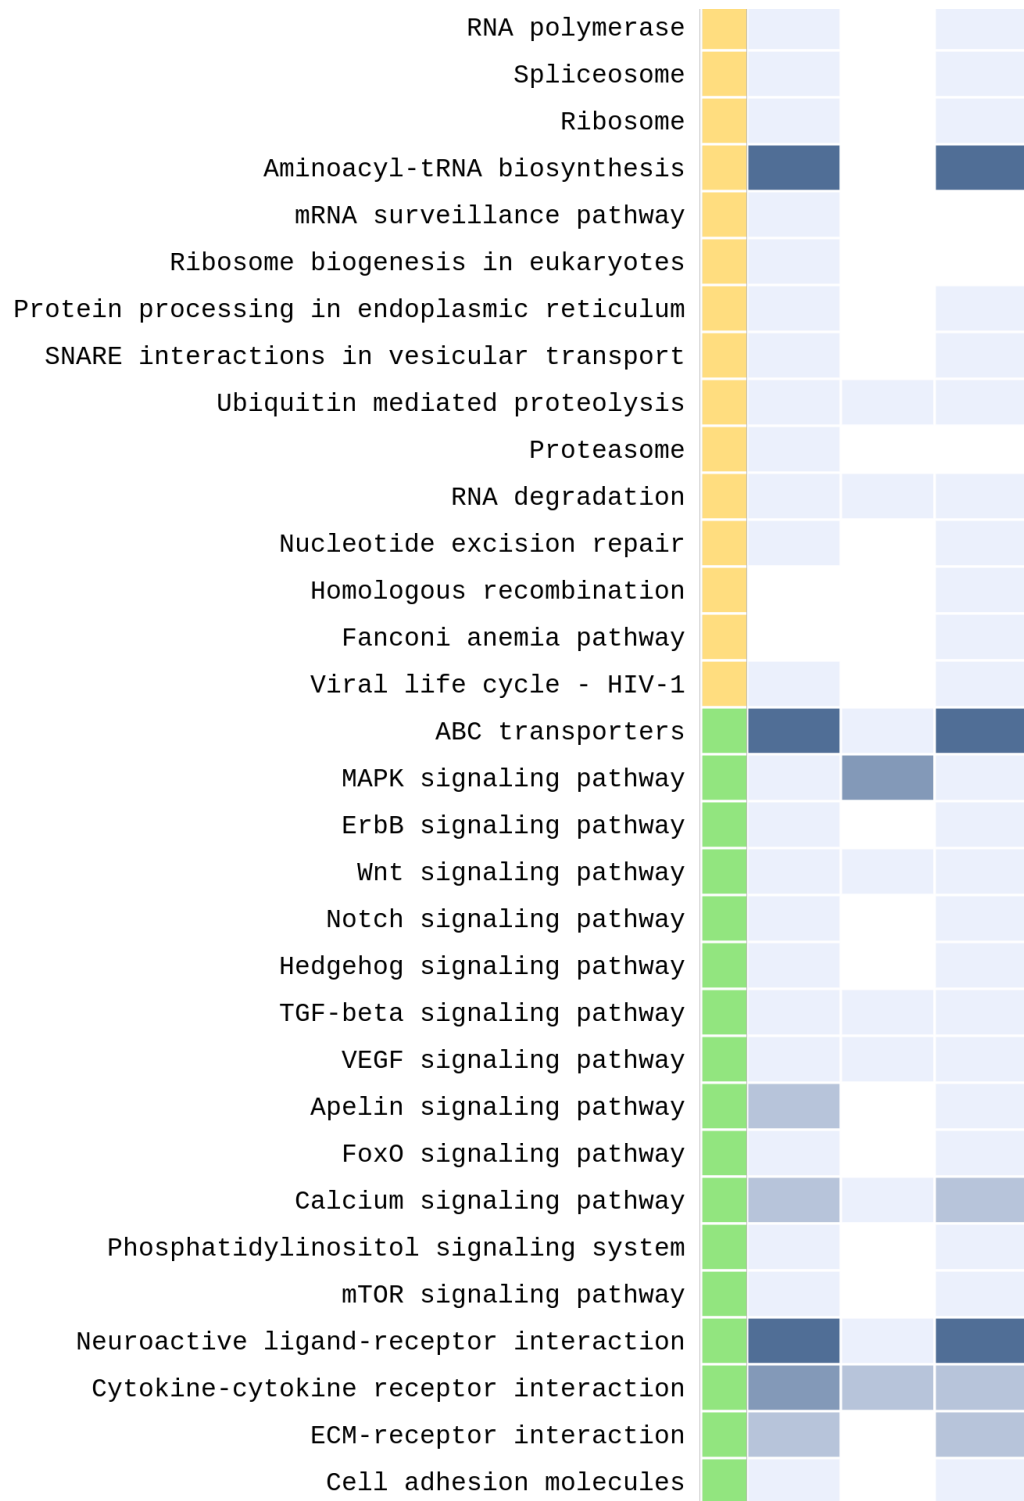

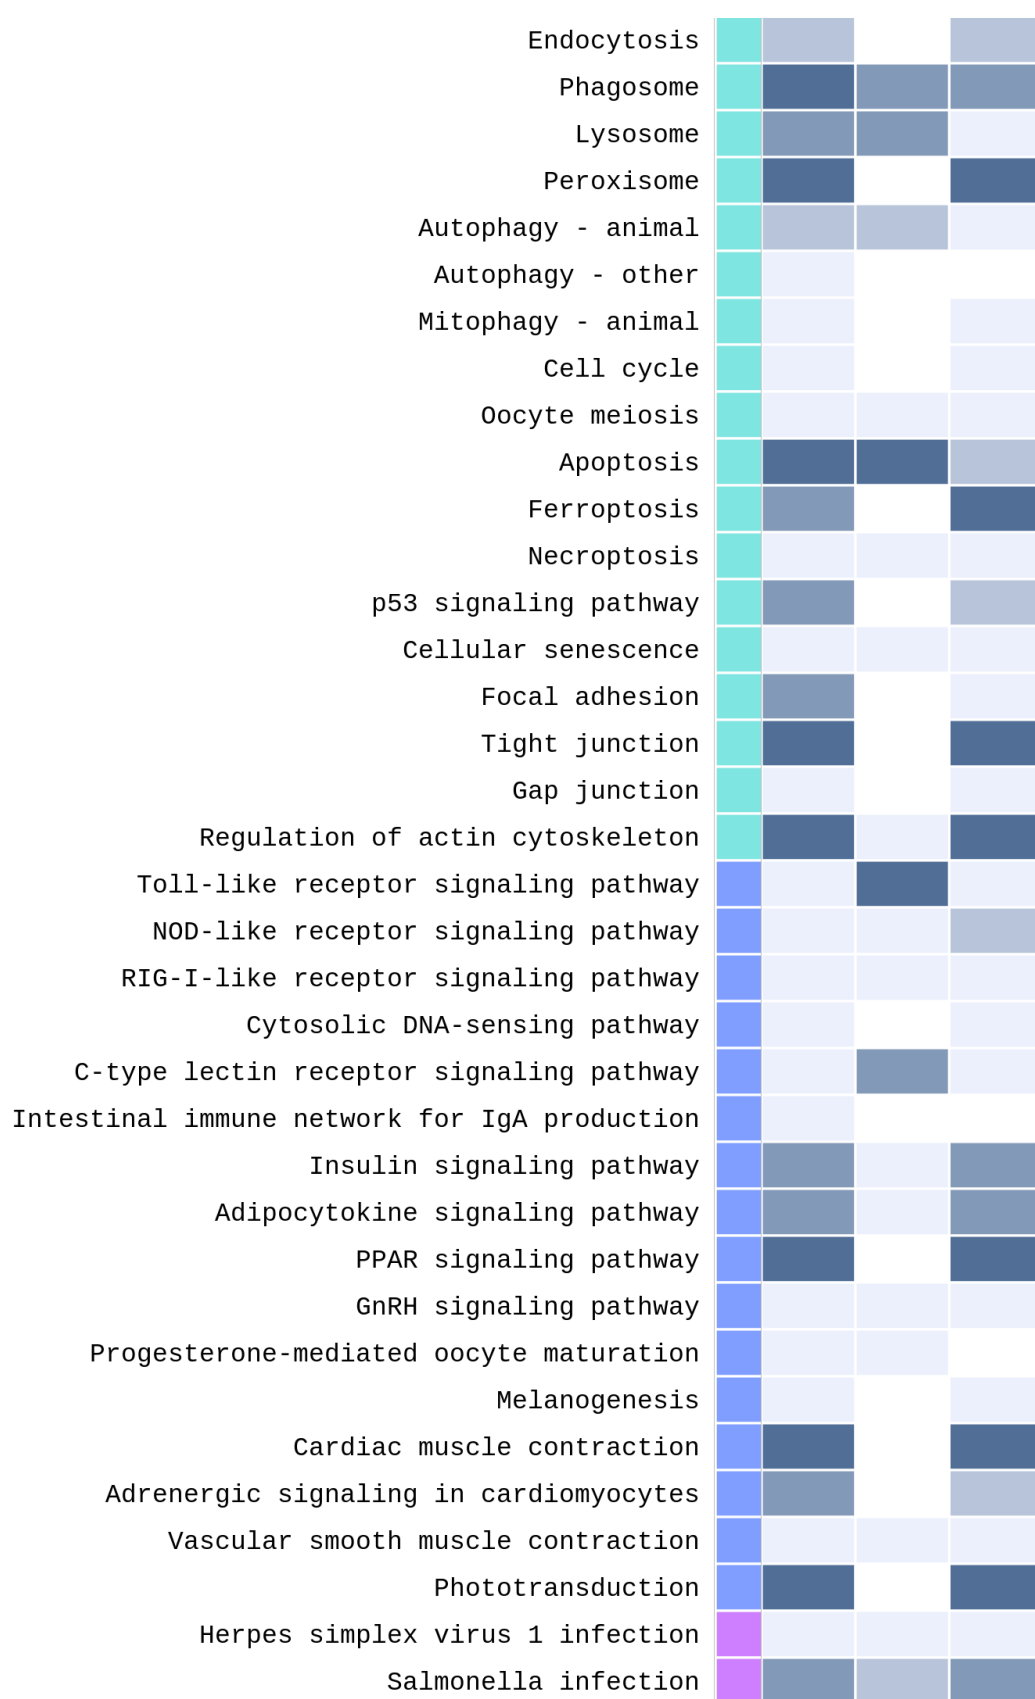

**Figure S3.** List of enriched pathway in KEGG pathway analysis

**Supplementary Table 1.** List of top upregulated ( $Fc > 5$ ) and top downregulated ( $Fc < -10$ ) gens after 4.0  $\mu\text{g/L}$  thiram treatment

| Transcript_ID                          | Gene_Symbol       | Description                                                              | THIRAM_high vs DMSO.fc |
|----------------------------------------|-------------------|--------------------------------------------------------------------------|------------------------|
| NM_001045282                           | zgc:136461        | zgc:136461                                                               | -136.787033            |
| NM_001024408,XM_005171867,XM_021476165 | ela3l             | elastase 3 like                                                          | -88.746940             |
| NM_001139464                           | ela2              | elastase 2                                                               | -57.165890             |
| NR_015620                              | sycn.2            | syncollin, tandem duplicate 2                                            | -43.916148             |
| NM_213249                              | chia.2            | chitinase, acidic.2                                                      | -38.589898             |
| NM_199886                              | ela2l             | elastase 2 like                                                          | -37.621427             |
| XM_021479024                           | LOC559107         | lactase-phlorizin hydrolase                                              | -36.644986             |
| NM_001020482                           | cpa1              | carboxypeptidase A1 (pancreatic)                                         | -28.059968             |
| NM_001077598                           | aoc1              | amine oxidase, copper containing 1                                       | -27.596219             |
| NM_001076723                           | ugt5a2            | UDP glucuronosyltransferase 5 family, polypeptide A2                     | -27.102873             |
| XM_005162727,XM_009297410              | si:ch211-161h7.5  | si:ch211-161h7.5, transcript variant X2                                  | -26.339568             |
| NM_001177498                           | ugt5a4            | UDP glucuronosyltransferase 5 family, polypeptide A4                     | -24.675914             |
| XM_017352058                           | si:ch211-219a15.4 | si:ch211-219a15.4                                                        | -21.130032             |
| NM_001040175,XM_005164755              | slc26a3.2         | solute carrier family 26 (anion exchanger), member 3, tandem duplicate 2 | -18.275764             |
| XM_001921697,XM_021477806              | LOC100147904      | zonadhesin, transcript variant X1                                        | -18.156202             |
| NM_001099240                           | zgc:154142        | zgc:154142                                                               | -17.294006             |
| NM_001007356                           | cyp2n13           | cytochrome P450, family 2, subfamily N, polypeptide 13                   | -17.191939             |
| NM_001030281                           | mep1a.1           | mep1a, alpha (PABA peptide hydrolase), tandem duplicate 1                | -16.950245             |
| XM_021470771                           | muc2.1            | mucin 2.1                                                                | -16.764632             |
| NM_001017724                           | zgc:112160        | zgc:112160                                                               | -16.346380             |
| NM_205643                              | pnp4b             | purine nucleoside phosphorylase 4b                                       | -16.264116             |

|                                              |                                |                                                                            |            |
|----------------------------------------------|--------------------------------|----------------------------------------------------------------------------|------------|
| NM_001045385                                 | Gck                            | glucokinase (hexokinase 4)                                                 | -16.146532 |
| XM_017351817                                 | si:ch211<br>-<br>214p16.<br>3  | si:ch211-214p16.3                                                          | -16.082961 |
| NM_001089325                                 | Anpepb                         | alanyl (membrane)<br>aminopeptidase b                                      | -16.059259 |
| NM_001003729                                 | zgc:921<br>37                  | zgc:92137                                                                  | -15.900719 |
| XM_001343386                                 | Eevs                           | 2-epi-5-epi-valiolone<br>synthase                                          | -15.859847 |
| XM_021468040                                 | LOC11<br>043812<br>5           | zonadhesin-like                                                            | -15.817021 |
| XM_009297092, XM_021470<br>040               | si:ch107<br>3-<br>138d10.<br>2 | si:ch1073-138d10.2,<br>transcript variant X2                               | -15.301128 |
| NM_001002076                                 | fabp6                          | fatty acid binding protein 6,<br>ileal (gastrotropin)                      | -14.773093 |
| XM_021478559                                 | LOC10<br>033141<br>7           | glycosyltransferase family 92<br>protein F13G3.3-like                      | -14.299863 |
| NM_001007297, XM_005169<br>359, XM_005169360 | ace2                           | angiotensin I converting<br>enzyme 2                                       | -14.111774 |
| NM_001109843                                 | rhcg11                         | Rh family, C glycoprotein,<br>like 1                                       | -13.463241 |
| NM_131788, XM_005155405                      | cry5                           | cryptochrome circadian clock<br>5                                          | -13.403722 |
| NM_001033097                                 | plac8.1                        | placenta-specific 8, tandem<br>duplicate 1                                 | -13.187097 |
| NM_001102388                                 | ankrd1b                        | ankyrin repeat domain 1b<br>(cardiac muscle)                               | -13.039337 |
| NM_199736                                    | slc6a19<br>b                   | solute carrier family 6<br>(neutral amino acid<br>transporter), member 19b | -12.814183 |
| XM_009293262, XM_021476<br>927               | vwa11                          | von Willebrand factor A<br>domain containing 11,<br>transcript variant X1  | -12.745574 |
| XM_003199562                                 | si:ch107<br>3-<br>13h15.3      | si:ch1073-13h15.3                                                          | -12.563861 |
| NM_001002368, XM_005158<br>777               | ctsl.1                         | cathepsin L.1                                                              | -12.497900 |
| XM_005156429                                 | LOC10<br>188249<br>6           | sushi, nidogen and EGF-like<br>domain-containing protein 1                 | -12.385683 |



|                                          |                 |                                                                                 |            |
|------------------------------------------|-----------------|---------------------------------------------------------------------------------|------------|
| XM_021466343                             | LOC110437898    | uncharacterized LOC110437898                                                    | -12.273213 |
| NM_001320118                             | dpep1           | dipeptidase 1 (renal)                                                           | -12.225874 |
| XM_021468039                             | wu:fb63a08      | wu:fb63a08                                                                      | -12.221217 |
| NM_001025188                             | alpi.2          | alkaline phosphatase, intestinal, tandem duplicate 2                            | -11.771664 |
| NM_001159584                             | itln3           | intelectin 3                                                                    | -11.634496 |
| rna-trnD                                 | trnD            | tRNA-Asp                                                                        | -11.555799 |
| NM_198064                                | slc15a1b        | solute carrier family 15 (oligopeptide transporter), member 1b                  | -11.453348 |
| NM_001098772                             | zgc:165502      | zgc:165502                                                                      | -11.362849 |
| XM_003200878                             | si:dkey-22f5.9  | si:dkey-22f5.9                                                                  | -11.275452 |
| rna-trnE                                 | trnE            | tRNA-Glu                                                                        | -11.168690 |
| NM_212618                                | ctrb1           | chymotrypsinogen B1                                                             | -10.778630 |
| XR_223934                                | si:dkey-104n9.1 | si:dkey-104n9.1                                                                 | -10.663062 |
| NM_131624                                | slc34a2a        | solute carrier family 34 (type II sodium/phosphate cotransporter), member 2a    | -10.561936 |
| NM_199605                                | prss59.1        | protease, serine, 59, tandem duplicate 1                                        | -10.274042 |
| NM_001077456                             | zgc:153968      | zgc:153968                                                                      | -10.265950 |
| NM_001002349                             | aqp10a          | aquaporin 10a                                                                   | -10.257251 |
| NM_001083007, XM_021480002               | zgc:153932      | zgc:153932                                                                      | -10.194839 |
| NM_001081497, XM_005159300               | slc28a1         | solute carrier family 28 (concentrative nucleoside transporter), member 1       | -10.131767 |
| NM_001037438                             | cyp3a65         | cytochrome P450, family 3, subfamily A, polypeptide 65                          | -10.105329 |
| NM_183347                                | sult1st2        | sulfotransferase family 1, cytosolic sulfotransferase 2                         | -10.041400 |
| XM_021467200, XM_021467205, XM_021467206 | myo7bb          | myosin VIIBb, transcript variant X2                                             | -10.020172 |
| XM_021468701, XR_002456254               | LOC110438198    | uncharacterized LOC110438198, transcript variant X1                             | 5.094741   |
| NM_001037674                             | Smtlb           | somatolactin beta                                                               | 5.095720   |
| XM_003198188, XM_021474762               | sdr42e2         | short chain dehydrogenase/reductase family 42E, member 2, transcript variant X2 | 5.129626   |

|                                                                      |                 |                                                            |           |
|----------------------------------------------------------------------|-----------------|------------------------------------------------------------|-----------|
| NM_001145614                                                         | ankrd37         | ankyrin repeat domain 37                                   | 5.165035  |
| XM_017351489                                                         | si:dkey-34k9.3  | si:dkey-34k9.3                                             | 5.256805  |
| NM_205569                                                            | Fosab           | v-fos FBJ murine osteosarcoma viral oncogene homolog Ab    | 5.429473  |
| NM_001327818                                                         | LOC557301       | cocaine- and amphetamine-regulated transcript protein-like | 5.447309  |
| NM_001113589                                                         | hsp70l          | heat shock cognate 70-kd protein, like                     | 5.453033  |
| XM_005164772                                                         | LOC101882092    | podocan-like protein 1                                     | 5.472315  |
| NM_001002493, XM_005160857                                           | jdp2b           | Jun dimerization protein 2b                                | 5.731857  |
| gene-LOC110438683                                                    | LOC110438683    | .                                                          | 6.012371  |
| XM_682306, XR_658820                                                 | tgm2l           | transglutaminase 2, like, transcript variant X1            | 6.096538  |
| NM_213310, XM_005169814                                              | egln3           | egl-9 family hypoxia-inducible factor 3                    | 6.141942  |
| XR_002456031                                                         | LOC110438090    | uncharacterized LOC110438090                               | 6.472505  |
| XM_017352961, XM_021469064, XR_002456325                             | LOC798694       | complement component C6-like, transcript variant X1        | 6.477369  |
| XR_002459390, XR_002459391, XR_002459392, XR_002459393, XR_002459394 | im:7152855      | im:7152855, transcript variant X1                          | 6.669534  |
| XR_002458203, XR_002458204                                           | LOC110439372    | uncharacterized LOC110439372, transcript variant X1        | 6.796486  |
| XM_001919491                                                         | si:ch73-265d7.2 | si:ch73-265d7.2                                            | 6.819292  |
| XR_002455919                                                         | LOC110438028    | uncharacterized LOC110438028                               | 6.836930  |
| XM_021478389, XM_021478390                                           | si:dkey-21p1.3  | si:dkey-21p1.3, transcript variant X2                      | 7.556664  |
| NM_001305571                                                         | Tcap            | titin-cap (telethonin)                                     | 7.685431  |
| NM_199950                                                            | socs3a          | suppressor of cytokine signaling 3a                        | 8.215998  |
| NM_001033740, XM_005165183                                           | dao.1           | D-amino-acid oxidase, tandem duplicate 1                   | 11.262813 |
| NM_001326701                                                         | hbae5           | hemoglobin, alpha embryonic                                | 15.261024 |

**Supplementary Table 2.** List of oligo primers used in qPCR validation

| <b>Gene<br/>(Sequence ID)</b>  | <b>Orientation</b> | <b>Oligo sequence</b> |
|--------------------------------|--------------------|-----------------------|
| <i>hbae5</i><br>(NM_001326701) | Forward            | TGAATTGCACGCCTTTCAGC  |
|                                | Reverse            | GCGGTGAAGTCATCAGGGAA  |
| <i>socs3a</i><br>(NM_199950)   | Forward            | ATGGAGTTGTCCAGCCACTG  |
|                                | Reverse            | GCAAGAATGGCGCTTCAACA  |
| <i>tcap</i><br>(NM_001305571)  | Forward            | TGACTGGCGCAGCATCAATA  |
|                                | Reverse            | GAGGACGCACCTGCCAATAA  |
| <i>egln3</i><br>(NM_213310)    | Forward            | TTTGGCTTTTGCGCAGGTTG  |
|                                | Reverse            | GGAATGCATGCGTTTGACCT  |
| <i>jdp2b</i><br>(NM_001002493) | Forward            | CTGGCGGAACCTTACCGTCT  |
|                                | Reverse            | CAAACGGTCTTTTGGCGTGT  |

|                                       |         |                         |
|---------------------------------------|---------|-------------------------|
| <i>smtlb</i><br>(NM_001037674)        | Forward | CTGCTTCCGAAAAGACGCAC    |
|                                       | Reverse | GGGAGCAGTTTTCCCTGTCA    |
| <i>ela2</i><br>(NM_001139464)         | Forward | TGATCGACAAGCAGTGGGTC    |
|                                       | Reverse | AGGTTGTGCTTGCCCAGTAA    |
| <i>chia.2</i><br>(NM_213249)          | Forward | TGGATAATTGCGGAGCAGGC    |
|                                       | Reverse | AATGTGCAGTGTCCCATTTC    |
| <i>aoc1</i><br>(NM_001077598)         | Forward | GACTCCAGGAAACTCGGTGG    |
|                                       | Reverse | TGACCCTTTTCATCGGGACG    |
| <i>ugt5a4</i><br>(NM_001177498)       | Forward | TTTGATGCTGACTTCGGGGA    |
|                                       | Reverse | CAGCAAGTGCCATTTCAGTCC   |
| $\beta$ -actin<br>(Housekeeping gene) | Forward | CGAGCTGTCTTCCCATCCA     |
|                                       | Reverse | TCACCAACGTAGCTGTCTTTCTG |
